# Supplementary material
Source: Springer Nature journal article supplement (https://www.springermedizin.de/resource/supplementary/13229_2013_116_MOESM5_ESM.pdf/9676208)

**A**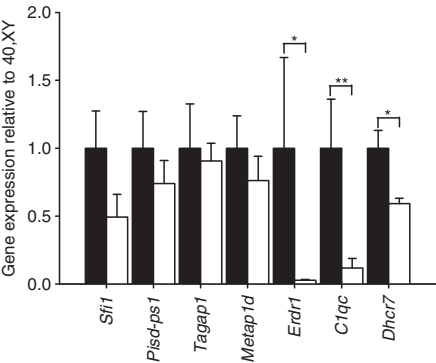**B**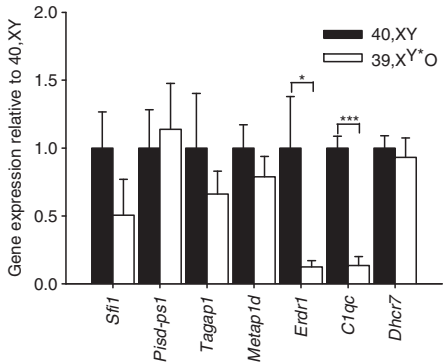

Supplement: MOESM5 [file 9676208]
